# Supplementary material for: Understanding what women want: eliciting preference for delivery health facility in a rural subcounty in Kenya, a discrete choice experiment
Source: PubMed Central journal article supplement — BMJ Open. 2020 Dec 2;10(12):e038865. doi: 10.1136/bmjopen-2020-038865 (PMC7713193; doi:10.1136/bmjopen-2020-038865), 2020-12-02
Supplement: bmjopen-2020-038865supp003.pdf [file bmjopen-2020-038865supp003.pdf]

| Field                       | WOMEN'S HEALTH AND HOUSEHOLD QUESTIONNAIRE                                                                                                                                                                  |
|-----------------------------|-------------------------------------------------------------------------------------------------------------------------------------------------------------------------------------------------------------|
|                             | <b>DEMOGRAPHIC QUESTIONS</b>                                                                                                                                                                                |
| <b>Age</b>                  | 1. What is your age?                                                                                                                                                                                        |
| <b>Residence</b>            | 2. How long have you lived in Embakasi North/Naivasha sub county?<br>A. I have lived here my whole life<br>B. I just moved to Embakasi North/Naivasha<br>C. Other                                           |
| <b>MovedWhen</b>            | 3. How many years ago did you move here?<br>A. 0-5 years<br>B. 5-10 years<br>C. 11-20 years<br>D. Over 20 years                                                                                             |
| <b>ResidenceWhy</b>         | 4. Why did you move to Embakasi North?<br>A. I have family or friends here<br>B. I heard there were business opportunities here<br>C. To be close to Nairobi City Centre<br>D. To look for work<br>E. Other |
| <b>Schooling</b>            | 5. What is your level of education?<br>A. Did not attend primary school<br>B. Primary School<br>C. Secondary School<br>D. Tertiary<br>E. University                                                         |
| <b>Married</b>              | 6. Are you married?<br>A. No<br>B. Yes                                                                                                                                                                      |
| <b>MarriedDuration</b>      | 7. How long have you been married?<br>A. 0-5 years<br>B. 5-10 years<br>C. 10-15 years<br>D. 15-20 years                                                                                                     |
| <b>HOUSEHOLD MODULE</b>     |                                                                                                                                                                                                             |
| <b>HeadofHousehold(HoH)</b> | 8. Are you the head of the household?( If an important decision is to be made in the Household are you the one who gets to decide<br>A. No<br>B. Yes                                                        |
| <b>Main Earner</b>          | 9. Are you the main earner in your household? Do you contribute the most to household expenditures?<br>A. No<br>B. Yes                                                                                      |
| <b>MainEarnerNo</b>         | 10. How are you related to the person who earns most in your household?<br>A. My Father/ My Husband/Boyfriend's father<br>B. My grandfather/ My Husband/Boyfriend's grandfather<br>C. My husband/Boyfriend  |

|                                                |                                                                                                                                                                                  |
|------------------------------------------------|----------------------------------------------------------------------------------------------------------------------------------------------------------------------------------|
|                                                | D. My mother/My Husband/boyfriend's mother<br>E. Another family member/ relative/ aunt/uncle<br>F. Other                                                                         |
| <b>HOUSEHOLD MODULE : SOCIOECONOMIC STATUS</b> |                                                                                                                                                                                  |
| <b>HoHMESame</b>                               | 11. Are the head of the household and the main earner the same person in your household?<br>A. No<br>B. Yes                                                                      |
| <b>adults</b>                                  | 12. How many people over the age of 18 live in your household?                                                                                                                   |
| <b>adultswomen</b>                             | 13. How many of these are women?                                                                                                                                                 |
| <b>adolescents</b>                             | 14. How many people aged between 14 and 18 live in the household                                                                                                                 |
| <b>adolescentwomen</b>                         | 15. How many of these people are women?                                                                                                                                          |
| <b>children</b>                                | 16. How many people under 13 live in your household?                                                                                                                             |
| <b>childWomen</b>                              | 17. How many of these children are women?                                                                                                                                        |
| <b>employedadults</b>                          | 18. How many members of your household contributed to your household expenses last month? ( <i>this includes things like rent, food, water, electricity fuel, cooking fuel</i> ) |
| <b>totalpublicexpenditure</b>                  | 19. How much did the employed adults contribute to your household expenses last month                                                                                            |
| <b>HOUSEHOLD ASSETS</b>                        |                                                                                                                                                                                  |
| <b>Refrigerators</b>                           | 20. How many refrigerators does your household own?                                                                                                                              |
| <b>Bicycles</b>                                | 21. How many bicycles does your household own?                                                                                                                                   |
| <b>Motorbikes</b>                              | 22. How many motorbikes does your household own?                                                                                                                                 |
| <b>Cars</b>                                    | 23. How many cars does your household own?                                                                                                                                       |
| <b>Televisions</b>                             | 24. How many Televisions does your household own?                                                                                                                                |
| <b>Radios</b>                                  | 25. How many radios does your household own?                                                                                                                                     |
| <b>Stereos</b>                                 | 26. How many stereos does your household own?                                                                                                                                    |
| <b>Mobiles</b>                                 | 27. How many mobiles does your household own?                                                                                                                                    |
| <b>Mattresses</b>                              | 28. How many mattresses does your household own?                                                                                                                                 |
| <b>waterExp</b>                                | 29. How much did your household spend on water last month?                                                                                                                       |
| <b>electricityExp</b>                          | 30. How much did your household spend on electricity last month?                                                                                                                 |
| <b>fuelExp</b>                                 | 31. How much did your household spend on fuel last month?                                                                                                                        |
| <b>REPRODUCTION AND PREGNANCY MODULE</b>       |                                                                                                                                                                                  |

|                             |                                                                                                                                                                                                                                                                                                                                                                                      |
|-----------------------------|--------------------------------------------------------------------------------------------------------------------------------------------------------------------------------------------------------------------------------------------------------------------------------------------------------------------------------------------------------------------------------------|
| <b>insurance</b>            | 32. Do you currently have health insurance?<br>A. No<br>B. Yes                                                                                                                                                                                                                                                                                                                       |
| <b>insuranceType</b>        | 33. What kind of insurance do you have?<br>A. NHIF<br>B. OBA<br>C. Private Insurance<br>D. Other                                                                                                                                                                                                                                                                                     |
| <b>insuranceOther</b>       | 34. The private insurance policy you have, what is the name of the company that provides it? specify                                                                                                                                                                                                                                                                                 |
| <b>insurancePrice</b>       | 35. How much do you pay per month for insurance?<br>(if the respondent doesn't pay monthly help them approximate the monthly rate)                                                                                                                                                                                                                                                   |
| <b>generalHospital</b>      | 36. Have you visited a clinic, hospital, or doctor in the last year to receive medical care unrelated to a pregnancy?<br>A. No<br>B. Yes                                                                                                                                                                                                                                             |
| <b>generalHospitalWhy</b>   | 37. During the most expensive visit to a clinic, hospital, or doctor in the last year, what was the visit for?<br>A. I was hurt in an accident and needed urgent care (example broken bones, stitches, allergic actions)<br>B. I was very sick and needed to get medicine or another kind of treatment example malaria, pneumonia)<br>C. I developed a condition and needed to sneak |
| <b>generalHospitalPaid</b>  | 38. How much did you spend in total on medical care received in the last year unrelated to pregnancy?                                                                                                                                                                                                                                                                                |
| <b>generalHospitalStill</b> | 39. Are you still seeking treatment for health conditions unrelated to pregnancy?<br>A. No<br>B. Yes                                                                                                                                                                                                                                                                                 |
| <b>anaemia</b>              | 40. Do you suffer from anemia?                                                                                                                                                                                                                                                                                                                                                       |
| <b>pregnantEver</b>         | 41. Have you ever been pregnant?                                                                                                                                                                                                                                                                                                                                                     |
| <b>pregnantAvoid</b>        | 42. Have you ever used anything or tried in any way to delay or avoid getting pregnant?                                                                                                                                                                                                                                                                                              |
| <b>timesPregnant</b>        | 43. How many times have you been pregnant?                                                                                                                                                                                                                                                                                                                                           |
| <b>livebirths</b>           | 44. How many livebirths have you had?                                                                                                                                                                                                                                                                                                                                                |
| <b>deaths</b>               | 45. Sometimes it happens that children die. It may be painful to talk about and I am sorry to ask you about such memories, but it is important to get correct information. Have you ever given birth to a son or daughter who was born alive but later died?                                                                                                                         |
| <b>deathsBoys</b>           | 46. How many of those were boys?                                                                                                                                                                                                                                                                                                                                                     |
| <b>miscarriages</b>         | 47. How many times have you had a pregnancy result in a miscarriage?                                                                                                                                                                                                                                                                                                                 |
| <b>stillbirths</b>          | 48. How many times have you had a pregnancy result in a stillbirth?                                                                                                                                                                                                                                                                                                                  |

|                          |                                                                                                                                                                                                                                                                                                                                                                                                                                                                                                                  |
|--------------------------|------------------------------------------------------------------------------------------------------------------------------------------------------------------------------------------------------------------------------------------------------------------------------------------------------------------------------------------------------------------------------------------------------------------------------------------------------------------------------------------------------------------|
| <b>yearPreg</b>          | 49. In what year did this pregnancy occur?                                                                                                                                                                                                                                                                                                                                                                                                                                                                       |
| <b>embakasinorthPreg</b> | 50. Were you living in Embakasi North sub County during this pregnancy?                                                                                                                                                                                                                                                                                                                                                                                                                                          |
| <b>nairobiPreg</b>       | 51. Were you living in Nairobi during this pregnancy?                                                                                                                                                                                                                                                                                                                                                                                                                                                            |
| <b>intended</b>          | 52. Was this pregnancy planned?                                                                                                                                                                                                                                                                                                                                                                                                                                                                                  |
| <b>marriedThen</b>       | 53. Were you married to the father at the time?                                                                                                                                                                                                                                                                                                                                                                                                                                                                  |
| <b>monthsPreg</b>        | 54. How many months were you pregnant before you gave birth?                                                                                                                                                                                                                                                                                                                                                                                                                                                     |
| <b>antenatalcare</b>     | 55. How many ante natal visits did you attend?                                                                                                                                                                                                                                                                                                                                                                                                                                                                   |
| <b>anc_first</b>         | 56. How many months pregnant were you when you first went for an ante natal care visit?                                                                                                                                                                                                                                                                                                                                                                                                                          |
| <b>ancSame</b>           | 57. Did you get ante natal care at the same facility where you planned to give birth?<br>A. No<br>B. Yes                                                                                                                                                                                                                                                                                                                                                                                                         |
| <b>ancElseWhy</b>        | 58. Why did you go somewhere different for ante natal care than the place you planned to give birth?                                                                                                                                                                                                                                                                                                                                                                                                             |
| <b>ancElseWhyMain</b>    | 59. What was the main reason you when somewhere different for ante natal care than the place you planned to give birth?<br>A. I was saving up to give birth in a nicer hospital than where I received ante natal care<br>B. I could afford ante natal care at that hospital, but not a birth there<br>C. Convenience: it was easier to go to the place where I received ante natal care than where I gave birth<br>D. Complications: I needed to go to a special hospital like Kenyatta because of complications |
| <b>insurancePr</b>       | 60. Did you have health insurance during this pregnancy?                                                                                                                                                                                                                                                                                                                                                                                                                                                         |
| <b>insuranceTypePr</b>   | 61. What kind of insurance did you have?                                                                                                                                                                                                                                                                                                                                                                                                                                                                         |
| <b>insurancePricePr</b>  | 62. How much did you pay per month for insurance?                                                                                                                                                                                                                                                                                                                                                                                                                                                                |
| <b>talkPrice</b>         | 63. Did anyone talk to you about how expensive it would be to give birth during ante-natal care?                                                                                                                                                                                                                                                                                                                                                                                                                 |
| <b>contactHospital</b>   | 64. Did you contact hospitals about prices before giving birth?                                                                                                                                                                                                                                                                                                                                                                                                                                                  |
| <b>savingMonths</b>      | 65. How many months before you gave birth did you begin putting aside money to pay for it?                                                                                                                                                                                                                                                                                                                                                                                                                       |
| <b>iron</b>              | 66. During this pregnancy, did you take any iron tablets or iron syrup?                                                                                                                                                                                                                                                                                                                                                                                                                                          |
| <b>Folic acid</b>        | 67. During this pregnancy, did you take any folic acid?                                                                                                                                                                                                                                                                                                                                                                                                                                                          |
| <b>malarial</b>          | 68. During this pregnancy, did you take any anti-malarial medication?                                                                                                                                                                                                                                                                                                                                                                                                                                            |
| <b>tetanus</b>           | 69. During this pregnancy, did you receive a shot in the arm to prevent the baby from getting tetanus (convulsions after birth)?                                                                                                                                                                                                                                                                                                                                                                                 |
| <b>vitA</b>              | 70. Did you experience any problems seeing during the daytime or at night?                                                                                                                                                                                                                                                                                                                                                                                                                                       |
| <b>specialist</b>        | 71. Did you visit an OB/GNY or specialist before giving birth?<br>A. No<br>B. Yes                                                                                                                                                                                                                                                                                                                                                                                                                                |

|                             |                                                                                                                                                                                                                                                                                                                                                          |
|-----------------------------|----------------------------------------------------------------------------------------------------------------------------------------------------------------------------------------------------------------------------------------------------------------------------------------------------------------------------------------------------------|
| <b>referral</b>             | 72. Were you referred to a larger hospital like Kenyatta National because a doctor determined that there might be complications with your pregnancy?<br>A. No<br>B. Yes                                                                                                                                                                                  |
| <b>complicationExpected</b> | 73. What complication where you referred for?<br>A. Sepsis<br>B. Hemorrhage<br>C. High blood pressure<br>D. Other                                                                                                                                                                                                                                        |
| <b>whereBirth</b>           | 74. Where did you give birth on this occasion?<br>A. Hospital<br>B. Home                                                                                                                                                                                                                                                                                 |
| <b>plannedFacility</b>      | 75. Is this where you originally planned to give birth,<br>A. No<br>B. Yes                                                                                                                                                                                                                                                                               |
| <b>whyChangePlans</b>       | 76. Did you have to change plans ? If yes, Why did you change your plans?<br>A. The baby came early and I had to go to the nearest facility<br>B. I wasn't able to afford the facility I originally planned on<br>C. I had more money that I expected when the baby was born so I could go to a nicer facility<br>D. No, didn't change plans<br>E. Other |
| <b>outsideFacility</b>      | 77. Why didn't you deliver in a health facility?<br>A. It was too expensive<br>B. I couldn't get to one in time once I went into labor<br>C. I don't trust the Doctor and nurses at the facilities I can afford<br>D. I don't trust health facilities<br>E. Other                                                                                        |
| <b>whyHere</b>              | 78. What qualities of the Health Facility did you find important in making the choice of delivering there?<br>A. Cost<br>B. Cleanliness<br>C. Distance from home<br>D. Availability of supplies and equipment<br>E. Qualification of health worker( nurse or doctor)<br>F. Waiting time<br>G. Staff attitude<br>H. Referral by relative<br>I. Other      |
| <b>whyHereMost</b>          | 79. What was the most important quality of the Health Facility in making the choice of delivering there?<br>A. Cost<br>B. Cleanliness<br>C. Distance from home<br>D. Availability of supplies and equipment<br>E. Qualification of health worker( nurse or doctor)<br>F. Waiting time<br>G. Staff attitude<br>H. Referral by relative                    |

|                          |                                                                                                                                              |
|--------------------------|----------------------------------------------------------------------------------------------------------------------------------------------|
|                          | I. Other                                                                                                                                     |
| <b>birthTime</b>         | 80. About how many hours did it take to deliver the baby, starting from when you first experienced contraction pains?                        |
| <b>cesarean</b>          | 81. Was this a normal birth, or was the baby delivered by cesarean section?<br>A. Normal birth<br>B. Cesarean                                |
| <b>cesareanEmergency</b> | 82. Was the cesarean planned or unexpected?<br>A. Planned<br>B. Unexpected                                                                   |
| <b>doctorAtAll</b>       | 83. After you arrived at the hospital to give birth, who of the following did you see?<br>A. Doctor<br>B. Only nurses<br>C. Birth attendants |
|                          | Thank you for participating in our survey. We really appreciate your time, and are grateful for meeting with us today.                       |
