# Supplementary material for: Understanding what women want: eliciting preference for delivery health facility in a rural subcounty in Kenya, a discrete choice experiment
Source: PubMed Central journal article supplement — BMJ Open. 2020 Dec 2;10(12):e038865. doi: 10.1136/bmjopen-2020-038865 (PMC7713193; doi:10.1136/bmjopen-2020-038865), 2020-12-02
Supplement: bmjopen-2020-038865supp004.pdf [file bmjopen-2020-038865supp004.pdf]

**Table 6. The mixed multinomial logit model showing interactions between sociodemographic variables and attributes to explain preference heterogeneity in choices made by women in a rural sub-County.**

| <b>Interaction terms (Mean Parameters)</b> |                    |       |                    |       |                             |       |                             |       |                    |       |                           |       |
|--------------------------------------------|--------------------|-------|--------------------|-------|-----------------------------|-------|-----------------------------|-------|--------------------|-------|---------------------------|-------|
|                                            | w/pri<br>educ(ref) |       | w/sec<br>educ(ref) |       | w/age<br>category1(<br>ref) |       | w/age<br>category<br>2(ref) |       | w/married<br>(ref) |       | w/main<br>earner<br>(ref) |       |
| <b>Attribute</b>                           | $\beta^a$          | RSE   | $\beta^a$          | RSE   | $\beta^a$                   | RSE   | $\beta^a$                   | RSE   | $\beta^a$          | RSE   | $\beta^a$                 | RSE   |
| <b>Attitude.</b>                           |                    |       |                    |       |                             |       |                             |       |                    |       |                           |       |
| Kind (Reference)                           | 0.009*             | 0.210 | 0.118              | 0.143 | -0.330**                    | 0.140 | 0.205                       | 0.141 | 0.218              | 0.187 | -0.198                    | 0.184 |
|                                            |                    |       |                    |       |                             |       |                             |       |                    |       |                           |       |
| <b>Medequip.</b>                           |                    |       |                    |       |                             |       |                             |       |                    |       |                           |       |
| Available (Reference)                      | 0.004**            | 0.098 | -0.124             | 0.09  | 0.067                       | 0.096 | -0.131                      | 0.092 | -0.419**           | 0.144 | 0.172                     | 0.125 |
|                                            |                    |       |                    |       |                             |       |                             |       |                    |       |                           |       |
| <b>QualClin.</b>                           |                    |       |                    |       |                             |       |                             |       |                    |       |                           |       |
| Good quality (Reference)                   | -0.202             | 0.151 | 0.355**            | 0.141 |                             |       |                             |       |                    |       |                           |       |
|                                            |                    |       |                    |       | -0.200                      | 0.131 | 0.279**                     | 0.131 | -0.352             | 0.226 | 0.092                     | 0.191 |
|                                            |                    |       |                    |       |                             |       |                             |       |                    |       |                           |       |
| <b>Distance.</b>                           |                    |       |                    |       |                             |       |                             |       |                    |       |                           |       |
| Short (Reference)                          | 0.116              | 0.079 | -0.109             | 0.077 | 0.062                       | 0.08  | -0.176**                    | 0.08  | 0.199*             | 0.116 | -0.206**                  | 0.103 |
|                                            |                    |       |                    |       |                             |       |                             |       |                    |       |                           |       |
| <b>Referral.</b>                           |                    |       |                    |       |                             |       |                             |       |                    |       |                           |       |
| Available (Reference)                      | 0.009              | 0.083 | 0.007              | 0.082 | -0.064                      | 0.083 | 0.027                       | 0.083 | 0.109              | 0.121 | -0.300**                  | 0.114 |

|                                 |                 |           |           |         |          |             |                   |          |          |         |                |         |
|---------------------------------|-----------------|-----------|-----------|---------|----------|-------------|-------------------|----------|----------|---------|----------------|---------|
| <b>Cost, (Ksh)<sup>b</sup></b>  | -<br>0.000046** | 0.0000218 | 0.00008   | 0.00002 | 9.23e-06 | 0.000<br>02 | -0.00003          | 0.00002  | -0.00002 | 0.00003 | -<br>0.00006** | 0.00003 |
| <b>Interaction terms (SDs)</b>  |                 |           |           |         |          |             |                   |          |          |         |                |         |
| <b>Attitude x covariate</b>     | 1.353***        | 0.334     | -0.347    | 0.225   | -0.320** | 0.143       | 0.549***          | 0.167    | 0.886*** | 0.137   | -0.817***      | 0.244   |
| <b>Medequip x covariate</b>     | -0.496***       | 0.111     | -0.483*** | 0.090   | 0.497*** | 0.135       | -<br>0.416**<br>* | 0.116    | 0.398*** | 0.125   | 0.153          | 0.185   |
| <b>Qualclin x<br/>covariate</b> | 0.709***        | 0.175     | 0.996***  | 0.220   | -0.065   | 0.161       | 0.920**<br>*      | 0.122    | 0.680*** | 0.131   | -0.232         | 0.158   |
| <b>Distance x covariate</b>     | 0.183           | 0.191     | -0.093*   | 0.093   | 0.349*** | 0.098       | -0.026            | 0.086    | -0.133   | 0.099   | 0.018          | 0.142   |
| <b>Referral x<br/>covariate</b> | 0.068           | 0.127     | -0.379*** | 0.102   | 0.345**  | 0.111       | 0.317**           | 0.131    | 0.382*** | 0.085   | 0.379***       | 0.118   |
| <b>Cost X covariate</b>         | -0.054**        | 0.00002   | 0.0000297 | 0.00004 | 0.00006  | 0.000<br>04 | 5.31e-06          | -0.00002 | 0.00002  | 0.00002 | 0.00002        | 0.00003 |
| <b>No. of respondents</b>       | 466             | 466       | 466       | 466     | 466      | 466         | 466               | 466      | 466      | 466     | 466            | 466     |
| <b>No. of observations</b>      | 22272           |           | 22,272    |         | 22,368   |             |                   |          | 22,368   |         | 22,320         |         |

|                           |           |  |          |  |          |  |          |  |          |  |          |  |
|---------------------------|-----------|--|----------|--|----------|--|----------|--|----------|--|----------|--|
| Log-likelihood            | -44442.18 |  | -4493.82 |  | -4399.34 |  | -4458.93 |  | -4473.60 |  | -4472.99 |  |
| Prob> $\chi^2$            | 0.0000    |  | 0.0000   |  | 0.0000   |  |          |  | 0.0000   |  | 0.0000   |  |
| Likelihood ratio $\chi^2$ | 2301.15   |  | 1462.88  |  | 3256.14  |  | 2298.41  |  | 1052.72  |  | 909.59   |  |
