# Supplementary figures and images for: Understanding what women want: eliciting preference for delivery health facility in a rural subcounty in Kenya, a discrete choice experiment
Source: PubMed Central journal article supplement — BMJ Open. 2020 Dec 2;10(12):e038865. doi: 10.1136/bmjopen-2020-038865 (PMC7713193; doi:10.1136/bmjopen-2020-038865), 2020-12-02

| Respondent | Choice task | Alternatives | Alternative Specific Constant | I. | II. | III. | IV. | V. | VI.  |
|------------|-------------|--------------|-------------------------------|----|-----|------|-----|----|------|
|            |             |              |                               | A  | B   | C    | D   | E  | F    |
| 1          | 1           | 1            | 1                             | 0  | 0   | 0    | 1   | 1  | 3000 |
| 1          | 1           | 2            | 1                             | 1  | 1   | 1    | 1   | 0  | 5000 |
| 1          | 1           | 3            | 0                             | 0  | 0   | 0    | 0   | 0  | 0    |
| 1          | 2           | 1            | 1                             | 1  | 1   | 0    | 1   | 1  | 3000 |
| 1          | 2           | 2            | 1                             | 1  | 0   | 0    | 0   | 0  | 3000 |
| 1          | 2           | 3            | 0                             | 0  | 0   | 0    | 0   | 0  | 0    |
| 1          | 3           | 1            | 1                             | 1  | 0   | 0    | 0   | 1  | 3000 |
| 1          | 3           | 2            | 1                             | 0  | 1   | 1    | 1   | 0  | 5000 |
| 1          | 3           | 3            | 0                             | 0  | 0   | 0    | 0   | 0  | 0    |
| 1          | 4           | 1            | 1                             | 0  | 1   | 1    | 0   | 0  | 5000 |
| 1          | 4           | 2            | 1                             | 1  | 0   | 0    | 1   | 1  | 8000 |
| 1          | 4           | 3            | 0                             | 0  | 0   | 0    | 0   | 0  | 0    |
| 1          | 5           | 1            | 1                             | 1  | 1   | 1    | 1   | 1  | 8000 |
| 1          | 5           | 2            | 1                             | 0  | 0   | 0    | 0   | 0  | 5000 |
| 1          | 5           | 3            | 0                             | 0  | 0   | 0    | 0   | 0  | 0    |
| 1          | 6           | 1            | 1                             | 0  | 0   | 1    | 0   | 0  | 3000 |
| 1          | 6           | 2            | 1                             | 1  | 1   | 1    | 1   | 1  | 5000 |
| 1          | 6           | 3            | 0                             | 0  | 0   | 0    | 0   | 0  | 0    |
| 1          | 7           | 1            | 1                             | 1  | 0   | 1    | 1   | 0  | 8000 |
| 1          | 7           | 2            | 1                             | 1  | 1   | 0    | 0   | 1  | 3000 |
| 1          | 7           | 3            | 0                             | 0  | 0   | 0    | 0   | 0  | 0    |
| 1          | 8           | 1            | 1                             | 1  | 1   | 1    | 1   | 1  | 8000 |
| 1          | 8           | 2            | 1                             | 0  | 0   | 0    | 1   | 1  | 5000 |
| 1          | 8           | 3            | 0                             | 0  | 0   | 0    | 0   | 0  | 0    |
| 1          | 9           | 1            | 1                             | 0  | 1   | 1    | 1   | 0  | 8000 |
| 1          | 9           | 2            | 1                             | 1  | 0   | 0    | 0   | 1  | 3000 |
| 1          | 9           | 3            | 0                             | 0  | 0   | 0    | 0   | 0  | 0    |
| 1          | 10          | 1            | 1                             | 1  | 1   | 0    | 0   | 0  | 5000 |
| 1          | 10          | 2            | 1                             | 0  | 0   | 1    | 1   | 1  | 8000 |
| 1          | 10          | 3            | 0                             | 0  | 0   | 0    | 0   | 0  | 0    |
| 1          | 11          | 1            | 1                             | 0  | 1   | 0    | 1   | 0  | 3000 |
| 1          | 11          | 2            | 1                             | 1  | 0   | 1    | 0   | 1  | 5000 |
| 1          | 11          | 3            | 0                             | 0  | 0   | 0    | 0   | 0  | 0    |
| 1          | 12          | 1            | 1                             | 0  | 0   | 1    | 1   | 1  | 3000 |
| 1          | 12          | 2            | 1                             | 1  | 1   | 0    | 0   | 0  | 5000 |
| 1          | 12          | 3            | 0                             | 0  | 0   | 0    | 0   | 0  | 0    |
| 1          | 13          | 1            | 1                             | 0  | 1   | 0    | 1   | 1  | 8000 |
| 1          | 13          | 2            | 1                             | 1  | 0   | 1    | 0   | 0  | 5000 |
| 1          | 13          | 3            | 0                             | 0  | 0   | 0    | 0   | 0  | 0    |
| 1          | 14          | 1            | 1                             | 0  | 1   | 0    | 1   | 0  | 3000 |
| 1          | 14          | 2            | 1                             | 1  | 0   | 1    | 0   | 1  | 3000 |

|   |    |   |   |   |   |   |   |   |      |
|---|----|---|---|---|---|---|---|---|------|
| 1 | 14 | 3 | 0 | 0 | 0 | 0 | 0 | 0 | 0    |
| 1 | 15 | 1 | 1 | 1 | 1 | 1 | 1 | 1 | 3000 |
| 1 | 15 | 2 | 1 | 0 | 0 | 0 | 0 | 1 | 3000 |
| 1 | 15 | 3 | 0 | 0 | 0 | 0 | 0 | 0 | 0    |
| 1 | 16 | 1 | 1 | 1 | 1 | 0 | 1 | 1 | 3000 |
| 1 | 16 | 2 | 1 | 0 | 0 | 1 | 0 | 1 | 3000 |
| 1 | 16 | 3 | 0 | 0 | 0 | 0 | 0 | 0 | 0    |



|  |  |
|--|--|
|  |  |
|  |  |
|  |  |
|  |  |
|  |  |
|  |  |
|  |  |
|  |  |
|  |  |
|  |  |
|  |  |

|  |  |
|--|--|
|  |  |
|--|--|





|  |  |
|--|--|
|  |  |
|  |  |
|  |  |
|  |  |
|  |  |
|  |  |
|  |  |
|  |  |
|  |  |
|  |  |
|  |  |
|  |  |

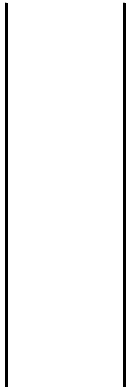

Supplement: bmjopen-2020-038865supp002.pdf [file bmjopen-2020-038865supp002.pdf]
